# Supplementary material for: The Hirudo Medicinalis Microbiome Is a Source of New Antimicrobial Peptides
Source: Int J Mol Sci. 2020 Sep 27;21(19):7141. doi: 10.3390/ijms21197141 (PMC7582656; doi:10.3390/ijms21197141)
Supplement: Supplementary file 1 [file ijms-21-07141-s001.pdf]

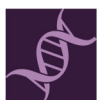

# The *Hirudo Medicinalis* Microbiome Is a Source of New Antimicrobial Peptides

Ekaterina Grafskaya <sup>1,\*</sup>, Elizaveta Pavlova <sup>1,2</sup>, Vladislav V. Babenko <sup>1</sup>, Ivan Latsis <sup>1</sup>, Maja Malakhova <sup>1</sup>, Victoria Lavrenova <sup>1,3</sup>, Pavel Bashkirov <sup>1</sup>, Dmitrii Belousov <sup>4</sup>, Dmitry Klinov <sup>1</sup> and Vassili Lazarev <sup>1,2,\*</sup>

<sup>1</sup> Federal Research and Clinical Center of Physical Chemical Medicine of Federal Medical Biological Agency, Moscow 119435, Russia; grafskayacath@gmail.com (E.G.); lizapavlova6@gmail.com (E.P.); daniorerio34@gmail.com (V. B.); lacis.ivan@gmail.com (I.L.); maja\_m@mail.ru (M.M.); lavrv1995@gmail.com (V.L.); pavel.bashkirov@niifhm.ru (P.B.); klinov.dmitry@mail.ru (D.K.)

<sup>2</sup> Moscow Institute of Physics and Technology, 141700 Dolgoprudny, Moscow region 141701, Russia; lizapavlova6@gmail.com

<sup>3</sup> Department of biochemistry, Faculty of Biology, Lomonosov Moscow State University, Moscow 119991, Russia; lavrv1995@gmail.com

<sup>4</sup> Sechenov First Moscow State Medical University Sechenov University, Moscow 119991, Russia; belik2011@mail.ru

\* Correspondence: grafskayacath@gmail.com (E.G.), lazarev@rcpcm.org (V.L.)

Received: 3 September 2020; Accepted: 25 September 2020; Published: 27 September 2020

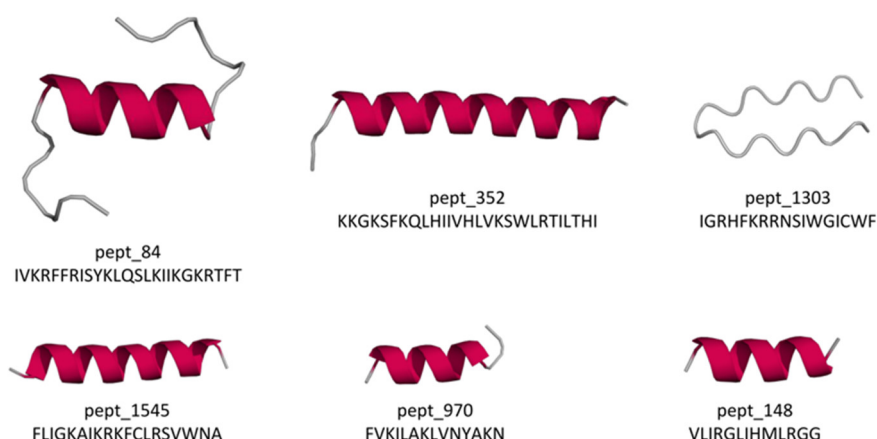

**Figure S1.** Predicted secondary structures of AMPs by the I-TASSER-MR server. The secondary structure region that adopts an  $\alpha$ -helical conformation is indicated in red.

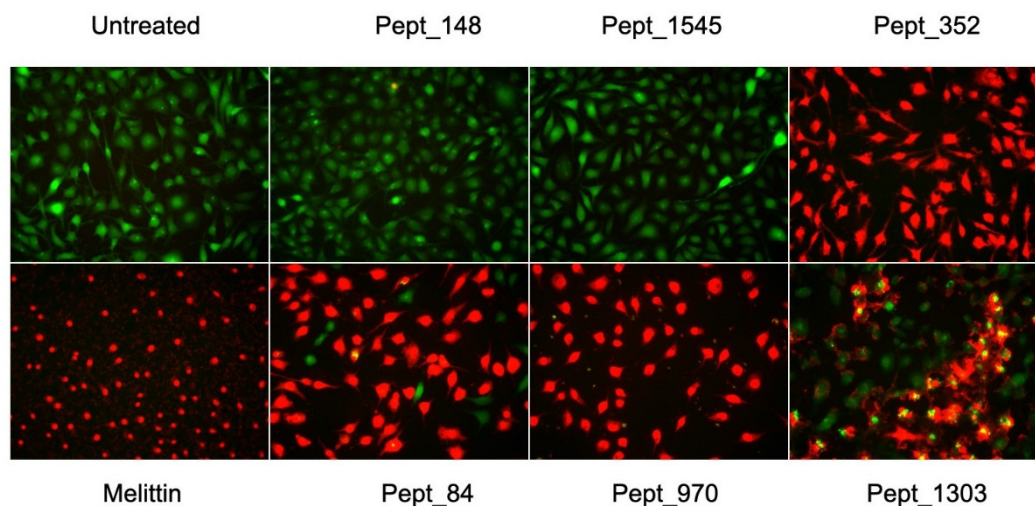

**Figure S2.** Effect of AMPs on the survival of McCoy cells. Cells were treated for 24 h with peptides at a final concentration equal to 4× MIC. After staining with calcein AM and ethidium homodimer-1, samples were analysed by fluorescence microscopy. The peptide melittin was used as a positive control. The negative control corresponds to the McCoy cells incubated without peptide (DMEM). The size of each individual frame is 485 µm× 366 µm.

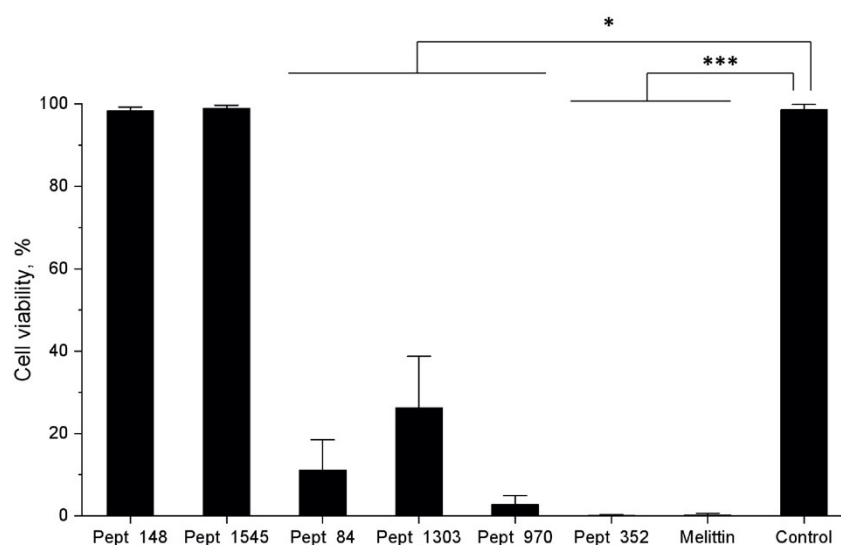

**Figure S3.** Viability of AMP-treated McCoy cells measured by LHD assay. Cells were treated for 24 h with peptides at a final concentration equal to 4× MIC. Melittin was used as a negative control. The positive control corresponds to untreated cells (Control). The values are represented as the mean ± SD (n = 3). Statistically significant differences between the control and experimental groups were determined by the non-parametric Kruskal–Wallis test, \* $p < 0.05$ , \*\*\* $p < 0.005$ .

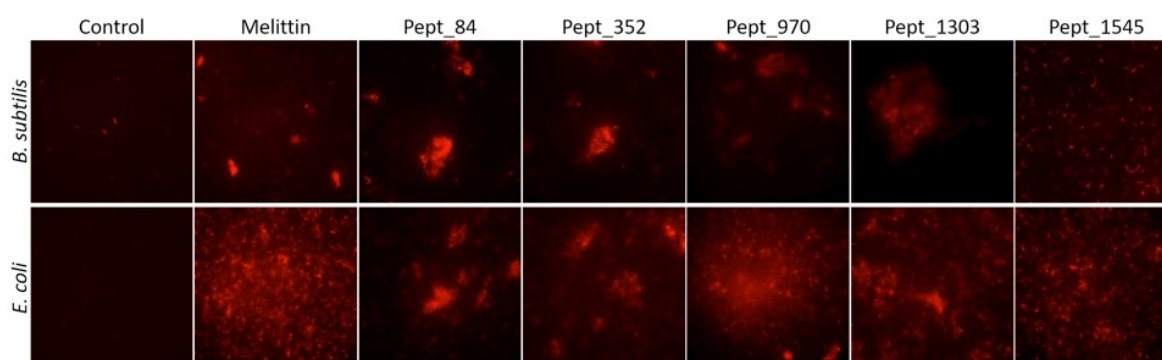

**Figure S4.** Effect of AMPs on the survival of bacterial cells after peptide treatment. *B. subtilis* (top row) and *E. coli* (bottom row) were incubated with peptides at a final concentration equal to 2× MIC at 37 °C for 1 h. After staining with PI, samples were analyzed by fluorescence microscopy. The peptide melittin was used as a positive control. The negative control corresponds to the bacteria incubated without peptide (MHB). The size of each individual frame is 222 µm× 222 µm.

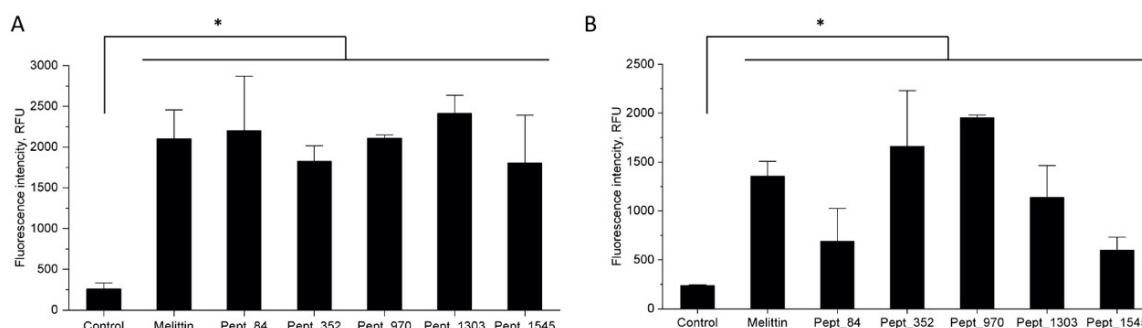

**Figure S5.** Effect of AMPs on the survival of bacterial cells after peptide treatment. *B. subtilis* (A) and *E. coli* (B) were incubated with peptides at a final concentration equal to 2× MIC at 37 °C for 1 h. After staining with PI, samples were analysed by fluorescence microscopy. The peptide melittin was used as a positive control. The negative control corresponds to the bacteria incubated without peptide (MHB). The column indicates the mean (±SD) fluorescence intensity for *B. subtilis* and *E. coli* strained with PI and treated with peptides and control cells. Statistically significant differences between the control and experimental groups were determined by the non-parametric Kruskal–Wallis test, \*p < 0.05.

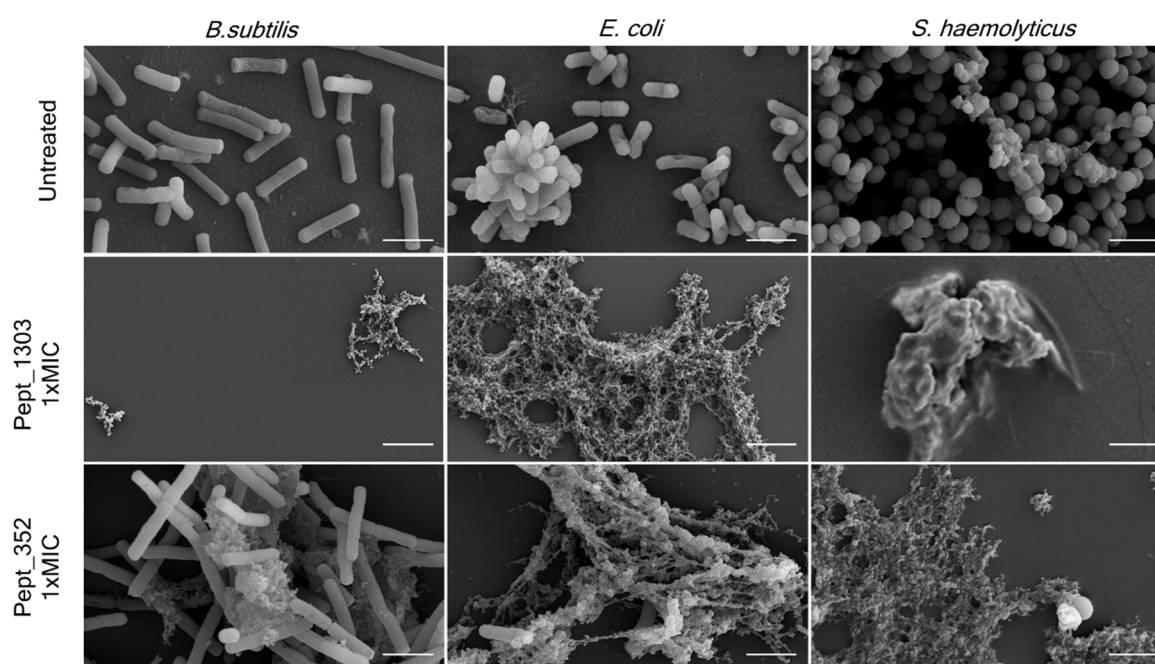

**Figure S6.** AMPs affect bacterial membrane integrity. Scanning electron microscopy (SEM) images of bacterial strains treated with peptides pept\_352 and pept\_1303. *B. subtilis* and *E. coli* were treated with peptides at a final concentration equal to 1/2× MIC and 1× MIC for 8 h, and *S. haemolyticus* was treated with peptides at a final concentration equal to 1/2× MIC and 1× MIC for 24 h. Scale bars: 2 µm.

**Table S1.** Data of AMP secondary structures based on the deconvolution analysis of CD spectra.

| Peptide   | Conditions       | Percentage of each secondary structure |              |          |          |            |
|-----------|------------------|----------------------------------------|--------------|----------|----------|------------|
|           |                  | Helix                                  | Antiparallel | Parallel | Turn     | Disordered |
| pept_1303 | aqueous solution | 0.4±0.2                                | 29.0±0.7     | 0.0±0.0  | 15.2±0.4 | 55.3±0.9   |
|           | buffer           | 0.8±0.1                                | 30.3±0.3     | 0.0±0.0  | 15.0±0.1 | 53.9±0.1   |

|           |                         |          |          |         |          |          |
|-----------|-------------------------|----------|----------|---------|----------|----------|
| pept_148  | buffer + POPC liposomes | 0.8±0.1  | 28.2±4.3 | 0.0±0.0 | 15.3±0.7 | 55.6±3.7 |
|           | aqueous solution        | 0.2±0.1  | 25.8±0.3 | 0.0±0.0 | 18.4±0.4 | 55.6±0.4 |
|           | buffer                  | 0.9±0.1  | 21.5±2.3 | 0.0±0.0 | 19.1±0.8 | 58.6±1.7 |
|           | buffer + POPC liposomes | 1.1±0.1  | 22.0±2.7 | 0.0±0.0 | 18.8±0.8 | 58.2±2.0 |
|           | aqueous solution        | 0.0±0.0  | 26.0±2.1 | 0.0±0.0 | 18.3±0.1 | 55.7±2.2 |
| pept_970  | buffer                  | 0.0±0.0  | 23.6±0.9 | 0.0±0.0 | 17.7±0.4 | 58.5±1.8 |
|           | buffer + POPC liposomes | 0.8±0.1  | 23.7±2.3 | 0.0±0.0 | 17.5±0.1 | 58.0±2.2 |
|           | aqueous solution        | 0.0±0.0  | 20.9±0.7 | 0.0±0.0 | 18.0±0.3 | 61.0±3.6 |
| pept_1545 | buffer                  | 0.0±0.0  | 26.0±0.2 | 0.0±0.0 | 17.8±0.4 | 56.3±0.4 |
|           | buffer + POPC liposomes | 0.0±0.0  | 25.7±0.6 | 0.0±0.0 | 17.7±0.2 | 56.3±0.4 |
|           | aqueous solution        | 2.6±0.2  | 25.2±3.5 | 0.0±0.0 | 16.4±1.0 | 55.9±2.8 |
| pept_352  | buffer                  | 12.6±2.7 | 25.1±2.3 | 4.6±0.1 | 13.5±0.1 | 44.6±0.4 |
|           | buffer + POPC liposomes | 17.1±0.5 | 24.2±0.2 | 5.0±0.1 | 12.5±0.1 | 41.2±0.4 |
|           | aqueous solution        | 0.0±0.0  | 26.7±0.5 | 0.0±0.0 | 17.8±0.1 | 55.5±0.4 |
| pept_84   | buffer                  | 0.0±0.0  | 28.3±0.3 | 0.0±0.0 | 17.8±0.1 | 54.0±0.3 |
|           | buffer + PC liposomes   | 0.0±0.0  | 28.6±0.5 | 0.0±0.0 | 17.9±0.1 | 53.5±0.4 |
|           | aqueous solution        | 3.3±0.1  | 29.0±1.2 | 0.0±0.0 | 16.5±0.2 | 51.3±1.1 |
| Melittin  | buffer                  | 4.3±0.3  | 28.1±0.8 | 0.0±0.0 | 16.3±0.2 | 51.3±0.6 |
|           | buffer + PC liposomes   | 11.5±0.8 | 21.5±4.9 | 6.8±0.9 | 14.4±0.6 | 45.9±2.7 |

**Table S2.** The physical-chemical characteristics of AMPs from the *H. medicinalis* microbiome.

| Peptide   | Amino acid sequence         | Charge | Protein-binding potential (Boman index), kcal/mol | Hydrophobic ratio, % |
|-----------|-----------------------------|--------|---------------------------------------------------|----------------------|
| pept_1303 | IGRHFkRRNSIWGICWF           | +4     | 2.14                                              | 47                   |
| pept_148  | VLIRGLIHMLRGG               | +2     | 0.05                                              | 53                   |
| pept_970  | FVKILAKLVNYAKN              | +3     | 0.04                                              | 57                   |
| pept_1545 | FLIGKAIKRKfCLRSVWNA         | +5     | 0.98                                              | 57                   |
| pept_352  | KKGKSfKQLHIIVHLVKSWLRtILTHI | +6     | 0.75                                              | 44                   |
| pept_84   | IVKRfFRISYKLQSLKIIKGKRTFT   | +8     | 1.86                                              | 40                   |
